# Supplementary material for: Differentiation of human induced pluripotent stem cells to mature functional Purkinje neurons
Source: PubMed Central journal article supplement (PMC4363833; doi:10.1038/srep09232), 2015-03-18
Supplement: srep09232-s1.pdf [file srep09232-s1.pdf]

# **Differentiation of human induced pluripotent stem cells to mature functional Purkinje neurons**

Shuyan Wang<sup>1,2,3</sup>, Bin Wang<sup>1</sup>, Na Pan<sup>5</sup>, Linlin Fu<sup>1</sup>, Chaodong Wang<sup>6</sup>, Gongru Song<sup>1</sup>, Jing An<sup>1</sup>, Zhongfeng Liu<sup>1</sup>, Wanwan Zhu<sup>1</sup>, Yunqian Guan<sup>1</sup>, Zhi-Qing David Xu<sup>5</sup>, Piu Chan<sup>3,6</sup>, Zhiguo Chen<sup>1,2,3,\*</sup>, Y. Alex Zhang<sup>1,4</sup>

<sup>1</sup> Sanofi-Xuanwu Joint Lab for Regenerative Medicine, Xuanwu Hospital, Capital Medical University, Beijing, 100053, China

<sup>2</sup> Center of Neural Injury and Repair, <sup>3</sup> Center of Parkinson's Disease, Beijing Institute for Brain Disorders, Beijing, China

<sup>4</sup> China R&D Center, Sanofi, Beijing 100022, China

<sup>5</sup> Department of Neurobiology, Beijing Key Laboratory of Major Brain Disorders, Beijing Institute of Brain Disorders, Capital Medical University, Beijing, 100069, China

<sup>6</sup> Department of Neurobiology, Xuanwu Hospital, Capital Medical University, Beijing, 100053, China

**\*Correspondence and requests for materials should be addressed to Zhiguo**

**Chen**

Zhiguo Chen, Ph.D.

Email: [chenzhiguo@gmail.com](mailto:chenzhiguo@gmail.com)

## Supplemental Information

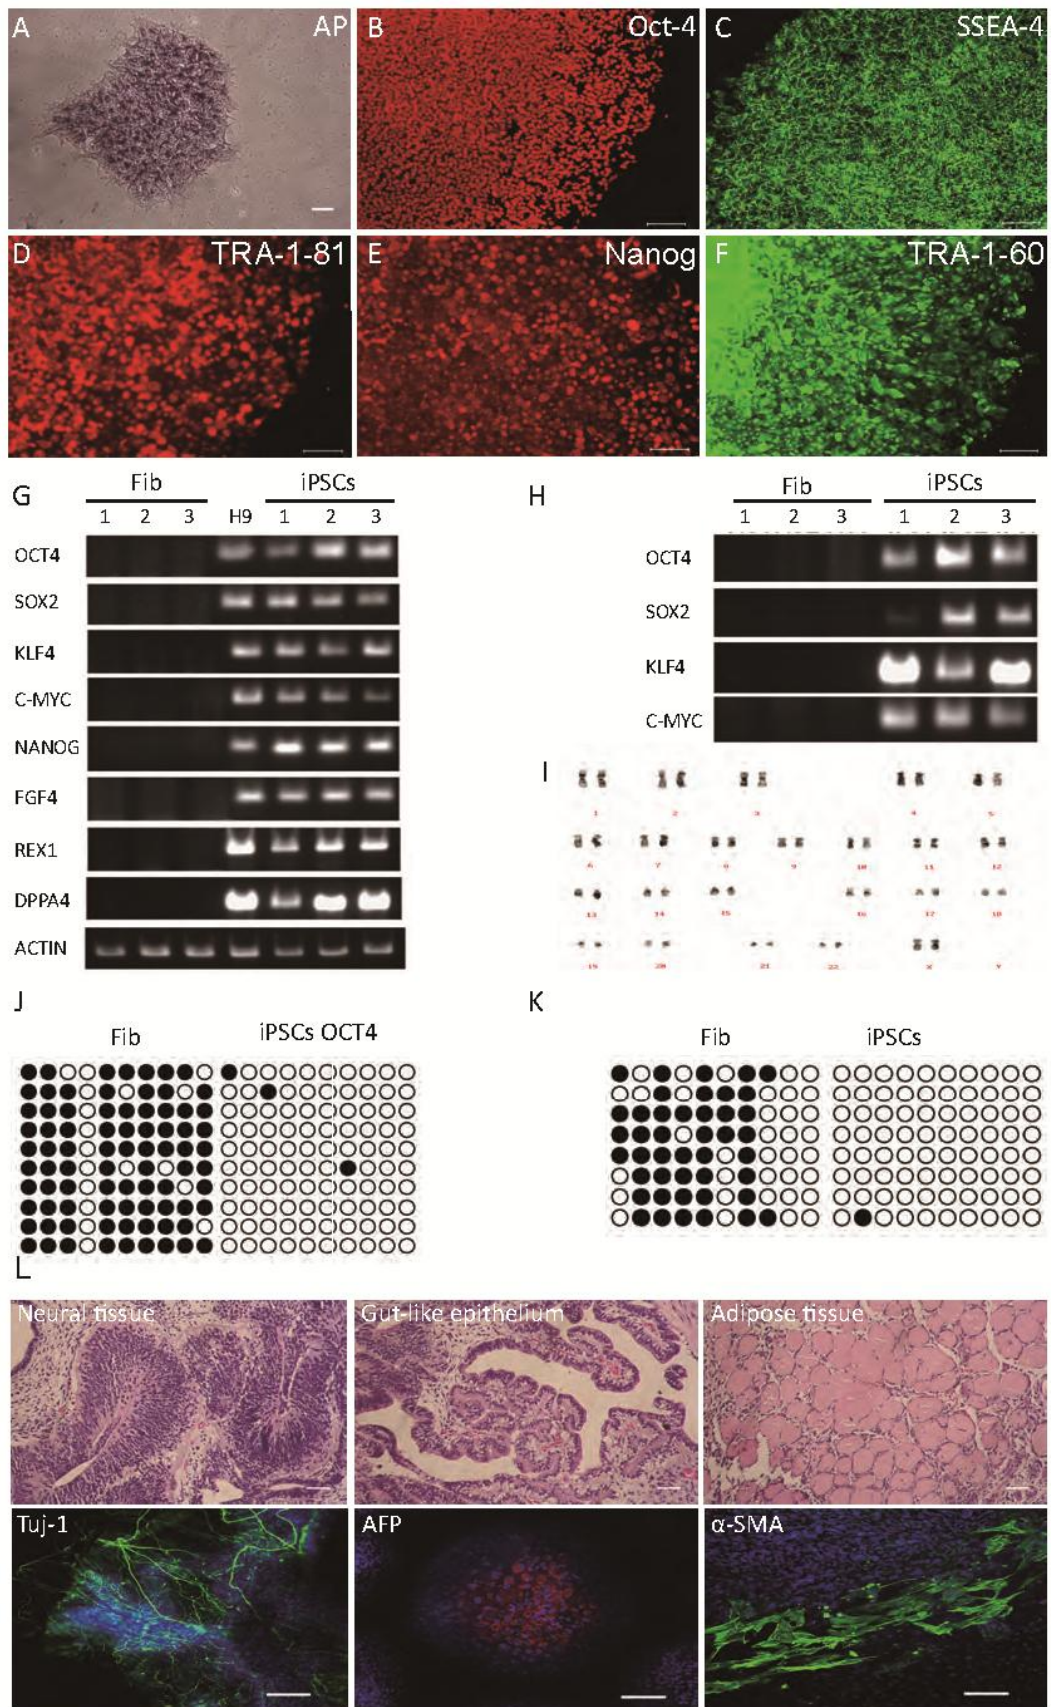

**Figure S1.** Generation and characterization of iPSCs. Related to Figure 1.

(A-F) Immunofluorescence staining for AP (A), Oct4 (b), SSEA-4 (C), TRA-1-81 (D), Nanog (E) and TRA-1-60 (F). Bar=100  $\mu$ m.

(G) Expression of pluripotent genes detected by RT-PCR. Primers for OCT4, SOX2, KLF4 and c-MYC were specific for endogenous genes.

(H) PCR of genomic DNA confirmed that the transgenes had incorporated into the genome.

(I) The iPSC clones showed normal karyotype.

(J, K) Bisulfate sequencing of promoter regions for endogenous OCT4 and NANOG genes. Open and closed circles indicated unmethylated and methylated CpG islands, respectively.

(L) Hematoxylin and Eosin staining of teratoma following injection of iPSCs into immunodeficient mice (upper pannel) and *in vitro* differentiation of iPSCs to 3-germ layer cells (lower panel). Bar=100  $\mu$ m.

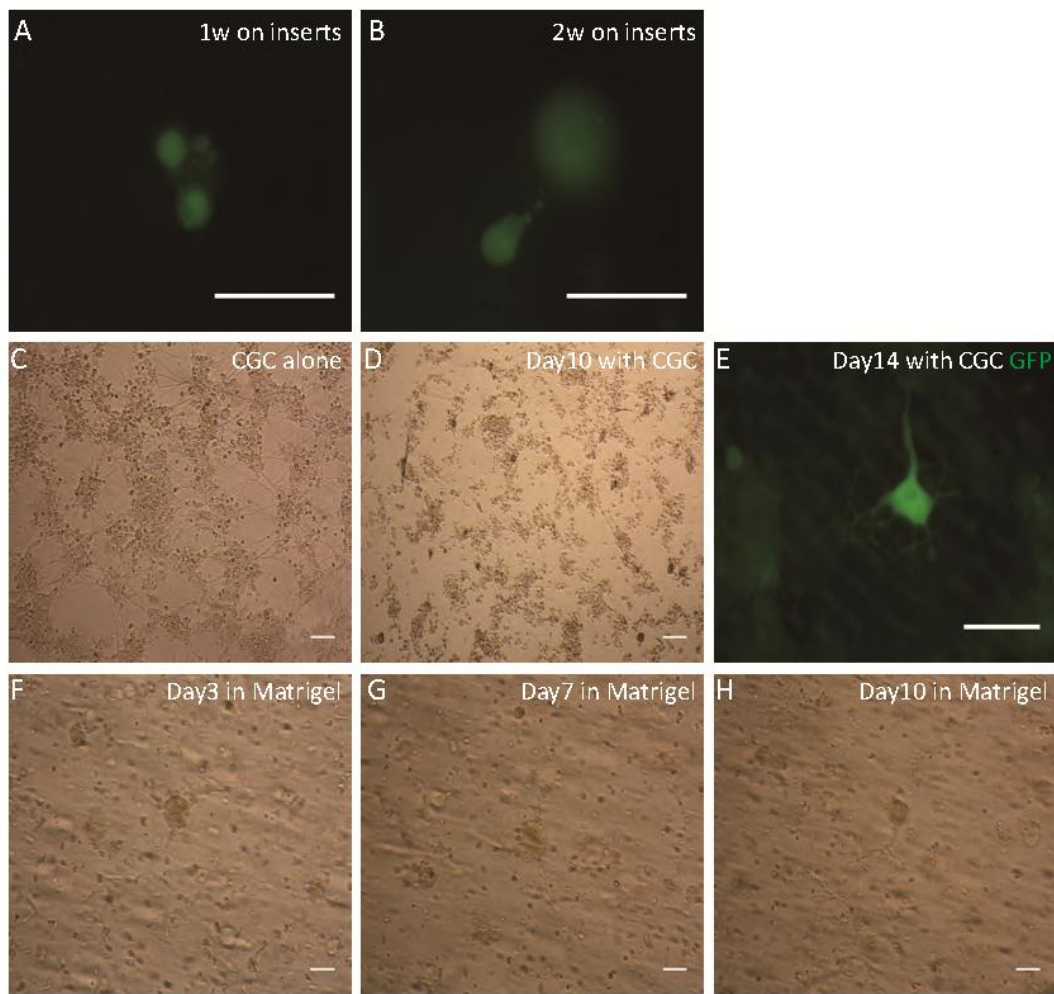

**Figure S2.** Neph3+ cells fail to survive or differentiate when cultured alone or with cerebellar granule cells. Related to Figure 2.

(A, B) Sorted neph3+ cells cultured on a whole membrane insert. On day 7 of differentiation, more than 80% of cells died and the surviving cells showed a round morphology (A). On day 14, less than 1% of cells survived and displayed an undifferentiated morphology (B). Bar=50  $\mu$ m.

(C) Cerebellar granule cells could survive for more than 4 weeks when cultured alone. Bar=100  $\mu$ m.

(D) In co-culture with Neph3+ cells, most granule cells died within 1 week. Bar=100

μm.

(E) After most Granule cells died, very few neph3+ cells (GFP-positive) survived and showed Purkinje cell morphology with very simple dendritic tree. Bar=50 μm

(F-H) Sorted Neph3+ cells failed to differentiate when co-cultured with cerebellar granule cells in a 3-dimensional manner. Bar=100 μm.

CGC: cerebellar granule cells.

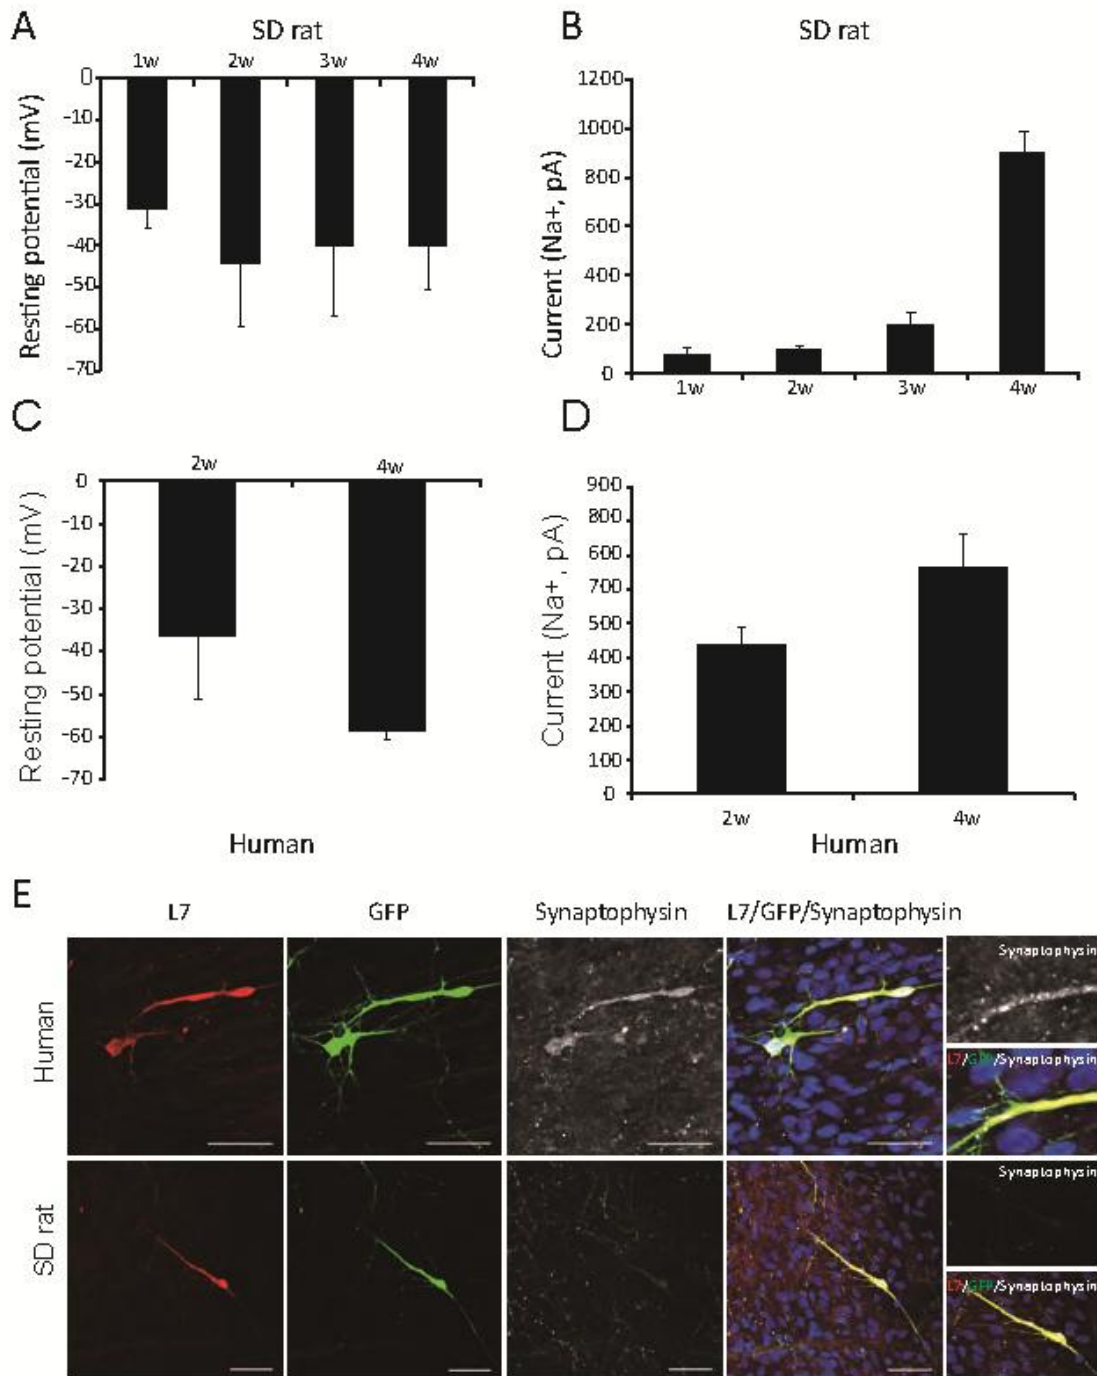

**Figure S3.** Electrophysiological characteristics of Purkinje cells co-cultured with SD rat and human fetal cerebellum slices. Related to Figure 3.

(A) Resting membrane potentials of recorded Purkinje cells on SD rat cerebellum slices at different time points.

(B) Sodium currents increased over the course of differentiation on SD rat cerebellum

slices.

(C) Resting membrane potentials of recorded Purkinje cells on human fetal cerebellum slice at different time points.

(D) Sodium currents increased over the course of differentiation on human fetal cerebellum slices.

(E) Immunocytochemical staining of Synaptophysin and L7 for co-culture on human fetal cerebellum slices and on SD rat cerebellum slices. Bar=50  $\mu\text{m}$ .

**Table S1. Antibodies used for immunohistochemistry analyses. Related to Figures 1 and 2.**

| <b>Antigen</b>      | <b>Company</b>    | <b>Catalog Number</b> | <b>Working Dilution</b> |
|---------------------|-------------------|-----------------------|-------------------------|
| Oct3/4              | Millipore         | MAB4401               | 1:200                   |
| SSEA-4              | eBioscience       | 14-8843-80            | 1:200                   |
| Nanog               | eBioscience       | 14-5769-80            | 1:200                   |
| TRA-1-60            | eBioscience       | 12-8863-80            | 1:200                   |
| TRA-1-81            | eBioscience       | 14-8883-80            | 1:200                   |
| $\alpha$ -SMA       | Abcam             | ab8207                | 1:100                   |
| AFP                 | eBioscience       | 14-6583-80            | 1:200                   |
| E-Cadherin          | eBioscience       | 53-3249               | 1:400                   |
| Kirrel2 (Neph3)     | R&D               | BAF2564               | 1:400                   |
| En2                 | Abcam             | ab28731               | 1:400                   |
| Ptf1a               | R&D               | AF6119                | 1:400                   |
| Ki67                | Novocastra        | NCL-L-Ki67-MM1        | 1:500                   |
| FUSSEL18<br>(Corl2) | Abgent            | AP11997b              | 1:50                    |
| L7 (PCP-2)          | Santa Cruz        | sc-49072              | 1:200                   |
| L7 (PCP-2)          | Santa Cruz        | sc-137064             | 1:200                   |
| GFP                 | Santa Cruz        | sc-9996               | 1:200                   |
| GFP                 | Life Technologies | A11122                | 1:500                   |
| Ataxin2             | Santa Cruz        | sc-18477              | 1:100                   |
| Grid2               | Abcam             | Ab101886              | 1:400                   |
| Synaptophysin       | Sigma             | S5768                 | 1:200                   |
| Tuj-1               | Millipore         | MAB1637               | 1:400                   |
| Calbindin           | CST               | 2173S                 | 1:200                   |



**Table S2. Sequences of primers for PCR, RT-PCR and Real-time PCR. Related to Figures 1 and 2.**

| <b>Primer Names</b>                                              | <b>Primer sequences (5'-3')</b> |
|------------------------------------------------------------------|---------------------------------|
| <b>RT-PCR primers used for characterization of iPSCs</b>         |                                 |
| <i>OCT4</i> endo F                                               | GACAGGGGGAGGGGAGGAGCTAGG        |
| <i>OCT4</i> endo R                                               | CTTCCCTCCAACCAGTTGCCCAAAC       |
| <i>SOX2</i> endo F                                               | GGGAAATGGGAGGGGTGCAAA AGAGG     |
| <i>SOX2</i> endo R                                               | TTGCGTGAGTGTGGATGGGAT TGGTG     |
| <i>KLF4</i> endo F                                               | ACGATCGTGGCCCCGAAAAGGACC        |
| <i>KLF4</i> endo R                                               | TGATTGTAGTGCTTTCTGGCTGGGCTCC    |
| <i>c-MYC</i> endo F                                              | GCGTCCTGGGAAGGGAGATCCGGAGC      |
| <i>c-MYC</i> endo R                                              | TTGAGGGGCATCGTCGCGGGAGGCTG      |
| <i>NANOG</i> F                                                   | CAGCCCCGATTCTTCCACCAGTCCC       |
| <i>NANOG</i> R                                                   | CGGAAGATTCCCAGTCGGGTTCCACC      |
| <i>GDF3</i> F                                                    | CTTATGCTACGTAAAGGAGCTGGG        |
| <i>GDF3</i> R                                                    | GTGCCAACCAGGTCCCGGAAGTT         |
| <i>REX1</i> F                                                    | CAGATCCTAACAGCTCGCAGAAT         |
| <i>REX1</i> R                                                    | GCG TACGCAAAT TAA AGT CCAGA     |
| <i>FGF4</i> F                                                    | CTACAACGCCTACGAGTCCTACA         |
| <i>FGF4</i> R                                                    | GTTGCACCAGAAAAG TCAGAG TTG      |
| <i>ESG1</i> F                                                    | ATATCCCGCCGTGGG TGAAAG TTC      |
| <i>ESG1</i> R                                                    | ACTCAGCCATGGACTGGAGCATCC        |
| <i>DPPA4</i> F                                                   | GGAGCCGCCTGCCCT GGAAAATTC       |
| <i>DPPA4</i> R                                                   | TTTTTCCTGATATTCTATTCCCAT        |
| <i>DPPA2</i> F                                                   | CCGTCCCCGCAATCT CCTTCCATC       |
| <i>DPPA2</i> R                                                   | ATGATGCCAACATGGCTCCCGGTG        |
| <b>Bisulfate sequencing primers</b>                              |                                 |
| meth <i>OCT-4</i> F                                              | GAGGTTGGAGTAGAAGGATTGTTTTGGTTT  |
| meth <i>OCT-4</i> R                                              | CCCCCTAACCACATCACCTCCACCACCTAA  |
| meth <i>NANOG</i> F                                              | TGGTTAGGTTGGTTTTAAATTTTTG       |
| meth <i>NANOG</i> R                                              | AACCCACCCTTATAAATTCTCAATTA      |
| <b>Primers for genomic DNA PCR</b>                               |                                 |
| <i>OCT4</i> Tg genomic F                                         | CCCCAGGGCCCCATT TTGGTACC        |
| <i>SOX2</i> Tg genomic F                                         | GGCACCCTGGCATGGCTCTTGGCTC       |
| <i>c-MYC</i> Tg genomic F                                        | CAACAACCGAAAATGCACCAGCCCCAG     |
| pMXs R                                                           | TTATCGTCGACCACT GTGCTGCTG       |
| PMXs L-3205                                                      | CCCTTTTTCTGGAGACTAAATAAA        |
| <b>RT-PCR primers used in Purkinje precursor differentiation</b> |                                 |
| <i>EN2</i> F                                                     | CGGCTCCAAGACGCTCTCGC            |
| <i>EN2</i> R                                                     | CTGGGACCTGAAGAAGGCCGGT          |
| <i>FGF8</i> F                                                    | CCTACCAACTCTACAGCCGC            |
| <i>FGF8</i> R                                                    | ACTCGGACTCTGCTTCCAAA            |

|                                          |                              |
|------------------------------------------|------------------------------|
| <i>WNT1</i> F                            | GGTTTCTGCTACGCTGCTG          |
| <i>WNT1</i> R                            | TAAGCAGGTTTCGTGGAGGAG        |
| <b>Primers used for quantitative PCR</b> |                              |
| <i>18s RNA</i> F                         | ACTCAACACGGGAAACCTCA         |
| <i>18S RNA</i> R                         | AACCAGACAAATCGCTCCAC         |
| <i>HPRT</i> F                            | GCTATAAATTCTTTGCTGACCTGCTG   |
| <i>HPRT</i> R                            | AATTACTTTTATGTCCCCTGTTGACTGG |
| <i>EN2</i> F                             | TACTCGGACCGGCCTTCTTC         |
| <i>EN2</i> R                             | AACTCGGCCTTGAGCCTCTG         |
| <i>WNT1</i> F                            | GGAAGTGTCCCCTGCTCCA          |
| <i>WNT1</i> R                            | GCGGAGGTGATAGCGAAGATAAAC     |
| <i>LHX1</i> F                            | GCGTCCAGTGCTGTGAATGTAA       |
| <i>LHX1</i> R                            | GAAGCAGTTCAGGTGAAACACTTTG    |
| <i>OTX1</i> F                            | TCGGCTTGGCCTACACATTCTATAC    |
| <i>OTX1</i> R                            | GGGCTCAAACAGCGGATCA          |
| <i>FGF8</i> F                            | GGCCTCTACATCTGCATGAACAA      |
| <i>FGF8</i> R                            | GGGTGAAGGCCATGTACCA          |
| <i>NEPH3</i> F                           | CGAGGTCCTGAAGAAGAGGAGAC      |
| <i>NEPH3</i> R                           | ACACTGACTCCTCGGACCTTGT       |
| <i>LHX5</i> F                            | ACGAGAACAAGTTCGTGTGCAAAG     |
| <i>LHX5</i> R                            | AACTGCGGTCCGTACAGGATG        |
